# Supplementary material for: Impact of sleep duration on executive function and brain structure
Source: PubMed Central journal article supplement (PMC8894343; doi:10.1038/s42003-022-03123-3), 2022-03-03
Supplement: 42003_2022_3123_MOESM2_ESM.pdf [file 42003_2022_3123_MOESM2_ESM.pdf]

## **Supplementary material**

**Supplementary Table 1 | Population demographics**

**Supplementary Table 2 | Biobank showcase variables used in all analyses**

**Supplementary Figure 1 | Relationship between sleep duration and individual cognitive tasks**

**Supplementary Table 3 | Association between summary volume measure of sleep-related brain regions with sleep duration, sleep characteristics, obstructive sleep apnoea traits and baseline characteristics of vascular status, genetic risk and socioeconomic status.**

**Supplementary Figure 2 | Differences in brain volume across 139 cortical and subcortical brain regions in participants who slept between six-to-eight hours and other sleep durations.**

**Supplementary Figure 3 | Differences in brain volume across 139 cortical and subcortical brain regions in participants who slept between six-to-eight hours and more than eight hours duration.**

**Supplementary Figure 4 | Differences in brain volume across 139 cortical and subcortical brain regions in participants who slept between six-to-eight hours and less than eight hours duration.**

**Supplementary Figure 5 | Regional brain volumes which are significantly associated with a higher executive function score and sleep duration six-to-eight hours.**

**Supplementary Figure 6 | Boxplots representation of data from main paper figures.**

Supplementary Table 1 | Population demographics

|                                               |                |
|-----------------------------------------------|----------------|
| <b>Total N</b>                                | 479 420        |
| <b>Sex</b>                                    |                |
| <b>Number Female (%)</b>                      | 262 777 (54.8) |
| <b>Number Male (%)</b>                        | 216 643 (45.2) |
| <b>Mean age at baseline assessment (SD)</b>   | 57.4 (8.0)     |
| <b>Mean age at Imaging assessment (SD)</b>    | 65.1 (7.7)     |
| <b>Median Townsend Index (IQR)</b>            | -2.2 (3.1)     |
| <b>Median sleep duration in hours (range)</b> | 7 (1-22)       |
| <u>Medication at baseline assessment:</u>     |                |
| <b>Blood pressure medication</b>              |                |
| <b>ON (%)</b>                                 | 28 894 (13.4)  |
| <b>Cholesterol lowering medication</b>        |                |
| <b>ON (%)</b>                                 | 38 069 (17.7)  |
| <b>Diabetes medication</b>                    |                |
| <b>ON (%)</b>                                 | 1659 (1.0)     |
| <b>Smoking status</b>                         |                |
| <b>Number never smoked (%)</b>                | 369 906 (77.2) |
| <b>Number 1-20 pack years (%)</b>             | 63 461 (13.2)  |
| <b>Number &gt;20 pack years (%)</b>           | 46 054 (9.6)   |
| <b>APOE <math>\epsilon</math> Status</b>      |                |
| <b>Number of <math>\epsilon</math>3/3 (%)</b> | 230 829 (69.4) |
| <b>Number of <math>\epsilon</math>3/4 (%)</b> | 92 716 (27.9)  |
| <b>Number of <math>\epsilon</math>4/4 (%)</b> | 9314 (1.9)     |
| <b>Mean Body mass Index (SD)</b>              | 27.4 (4.8)     |
| <b>Male</b>                                   | 27.8 (4.2)     |
| <b>Female</b>                                 | 27.1 (5.2)     |

*SD: standard deviation; IQR: interquartile range; APOE: apolipoprotein E.*

**Supplementary Table 2. Biobank showcase for information for variables**

| <b>Variable</b>                                      | <b>Field ID</b> | <b>Biobank showcase link</b>                                                                                                      | <b>Instance</b> |
|------------------------------------------------------|-----------------|-----------------------------------------------------------------------------------------------------------------------------------|-----------------|
| <b>Year of birth</b>                                 | 34              | <a href="https://biobank.ndph.ox.ac.uk/showcase/field.cgi?id=34">https://biobank.ndph.ox.ac.uk/showcase/field.cgi?id=34</a>       | 0               |
| <b>Date of attending assessment centre</b>           | 53              | <a href="https://biobank.ndph.ox.ac.uk/showcase/field.cgi?id=53">https://biobank.ndph.ox.ac.uk/showcase/field.cgi?id=53</a>       | 0,2             |
| <b>Sleep duration</b>                                | 1160            | <a href="https://biobank.ndph.ox.ac.uk/showcase/field.cgi?id=1160">https://biobank.ndph.ox.ac.uk/showcase/field.cgi?id=1160</a>   | 0, 2            |
| <b>Sleep chronotype</b>                              | 1180            | <a href="https://biobank.ndph.ox.ac.uk/showcase/field.cgi?id=1180">https://biobank.ndph.ox.ac.uk/showcase/field.cgi?id=1180</a>   | 0,2             |
| <b>Report of sleeplessness/ insomnia</b>             | 1200            | <a href="https://biobank.ndph.ox.ac.uk/showcase/field.cgi?id=1200">https://biobank.ndph.ox.ac.uk/showcase/field.cgi?id=1200</a>   | 0,2             |
| <b>Report of snoring</b>                             | 1210            | <a href="https://biobank.ndph.ox.ac.uk/showcase/field.cgi?id=1210">https://biobank.ndph.ox.ac.uk/showcase/field.cgi?id=1210</a>   | 0,2             |
| <b>Report of daytime sleepiness</b>                  | 1220            | <a href="https://biobank.ndph.ox.ac.uk/showcase/field.cgi?id=1220">https://biobank.ndph.ox.ac.uk/showcase/field.cgi?id=1220</a>   | 0,2             |
| <b>Reaction time</b>                                 | 20023           | <a href="http://biobank.ndph.ox.ac.uk/showcase/field.cgi?id=20023">http://biobank.ndph.ox.ac.uk/showcase/field.cgi?id=20023</a>   | 0               |
| <b>Pairs matching accuracy</b>                       | 399             | <a href="http://biobank.ndph.ox.ac.uk/showcase/field.cgi?id=399">http://biobank.ndph.ox.ac.uk/showcase/field.cgi?id=399</a>       | 0               |
| <b>Trail making numeric path duration</b>            | 6348            | <a href="https://biobank.ndph.ox.ac.uk/showcase/field.cgi?id=6348">https://biobank.ndph.ox.ac.uk/showcase/field.cgi?id=6348</a>   | 2               |
| <b>Trail making alphanumeric path duration</b>       | 6350            | <a href="https://biobank.ndph.ox.ac.uk/showcase/field.cgi?id=6350">https://biobank.ndph.ox.ac.uk/showcase/field.cgi?id=6350</a>   | 2               |
| <b>Tower Rearranging number of puzzles correct</b>   | 21004           | <a href="https://biobank.ndph.ox.ac.uk/showcase/field.cgi?id=21004">https://biobank.ndph.ox.ac.uk/showcase/field.cgi?id=21004</a> | 2               |
| <b>Tower Rearranging number of puzzles attempted</b> | 6383            | <a href="https://biobank.ndph.ox.ac.uk/showcase/field.cgi?id=6383">https://biobank.ndph.ox.ac.uk/showcase/field.cgi?id=6383</a>   | 2               |
| <b>Symbol-digit substitution number correct</b>      | 23323           | <a href="https://biobank.ndph.ox.ac.uk/showcase/field.cgi?id=23323">https://biobank.ndph.ox.ac.uk/showcase/field.cgi?id=23323</a> | 2               |
| <b>Symbol-digit substitution number attempted</b>    | 23324           | <a href="https://biobank.ndph.ox.ac.uk/showcase/field.cgi?id=23324">https://biobank.ndph.ox.ac.uk/showcase/field.cgi?id=23324</a> | 2               |
| <b>Townsend deprivation index (at recruitment)</b>   | 189             | <a href="https://biobank.ndph.ox.ac.uk/showcase/field.cgi?id=189">https://biobank.ndph.ox.ac.uk/showcase/field.cgi?id=189</a>     | 0               |
| <b>Cholesterol lowering medication</b>               | 6177            | <a href="http://biobank.ctsu.ox.ac.uk/showcase/field.cgi?id=6177">http://biobank.ctsu.ox.ac.uk/showcase/field.cgi?id=6177</a>     | 0               |
| <b>Blood pressure medication</b>                     | 6177            | <a href="http://biobank.ctsu.ox.ac.uk/showcase/field.cgi?id=6177">http://biobank.ctsu.ox.ac.uk/showcase/field.cgi?id=6177</a>     | 0               |
| <b>Diabetes medication</b>                           | 6177            | <a href="http://biobank.ctsu.ox.ac.uk/showcase/field.cgi?id=6177">http://biobank.ctsu.ox.ac.uk/showcase/field.cgi?id=6177</a>     | 0               |

|                                                             |       |                                                                                                                                   |     |
|-------------------------------------------------------------|-------|-----------------------------------------------------------------------------------------------------------------------------------|-----|
| <b>Body Mass Index</b>                                      | 23104 | <a href="https://biobank.ndph.ox.ac.uk/showcase/field.cgi?id=23104">https://biobank.ndph.ox.ac.uk/showcase/field.cgi?id=23104</a> | 0,2 |
| <b>Number of cigarettes smoked daily (current smokers)</b>  | 2887  | <a href="http://biobank.ctsu.ox.ac.uk/crystal/field.cgi?id=2887">http://biobank.ctsu.ox.ac.uk/crystal/field.cgi?id=2887</a>       | 0   |
| <b>Number of cigarettes smoked daily (previous smokers)</b> | 6183  | <a href="http://biobank.ctsu.ox.ac.uk/crystal/field.cgi?id=6183">http://biobank.ctsu.ox.ac.uk/crystal/field.cgi?id=6183</a>       | 0   |
| <b>Age started smoking (current smokers)</b>                | 3436  | <a href="http://biobank.ctsu.ox.ac.uk/crystal/field.cgi?id=3436">http://biobank.ctsu.ox.ac.uk/crystal/field.cgi?id=3436</a>       | 0   |
| <b>Age started smoking (former smokers)</b>                 | 2867  | <a href="http://biobank.ctsu.ox.ac.uk/crystal/field.cgi?id=2867">http://biobank.ctsu.ox.ac.uk/crystal/field.cgi?id=2867</a>       | 0   |
| <b>Ever tried to stop smoking</b>                           | 3486  | <a href="http://biobank.ctsu.ox.ac.uk/crystal/field.cgi?id=3486">http://biobank.ctsu.ox.ac.uk/crystal/field.cgi?id=3486</a>       | 1   |
| <b>Stopped smoking (&gt;6 months)</b>                       | 2907  | <a href="http://biobank.ctsu.ox.ac.uk/crystal/field.cgi?id=2907">http://biobank.ctsu.ox.ac.uk/crystal/field.cgi?id=2907</a>       | 1   |
| <b>Age stopped smoking</b>                                  | 2897  | <a href="http://biobank.ctsu.ox.ac.uk/crystal/field.cgi?id=2897">http://biobank.ctsu.ox.ac.uk/crystal/field.cgi?id=2897</a>       | 1   |
| <b>Regional grey matter volumes (FAST)</b>                  | 1101  | <a href="https://biobank.ndph.ox.ac.uk/showcase/label.cgi?id=1101">https://biobank.ndph.ox.ac.uk/showcase/label.cgi?id=1101</a>   | 2   |
| <b>Subcortical volumes (FIRST)</b>                          | 1102  | <a href="https://biobank.ndph.ox.ac.uk/showcase/label.cgi?id=1102">https://biobank.ndph.ox.ac.uk/showcase/label.cgi?id=1102</a>   | 2   |
| <b>White matter hyperintensity volume</b>                   | 25781 | <a href="http://biobank.ndph.ox.ac.uk/showcase/field.cgi?id=25781">http://biobank.ndph.ox.ac.uk/showcase/field.cgi?id=25781</a>   | 2   |

---

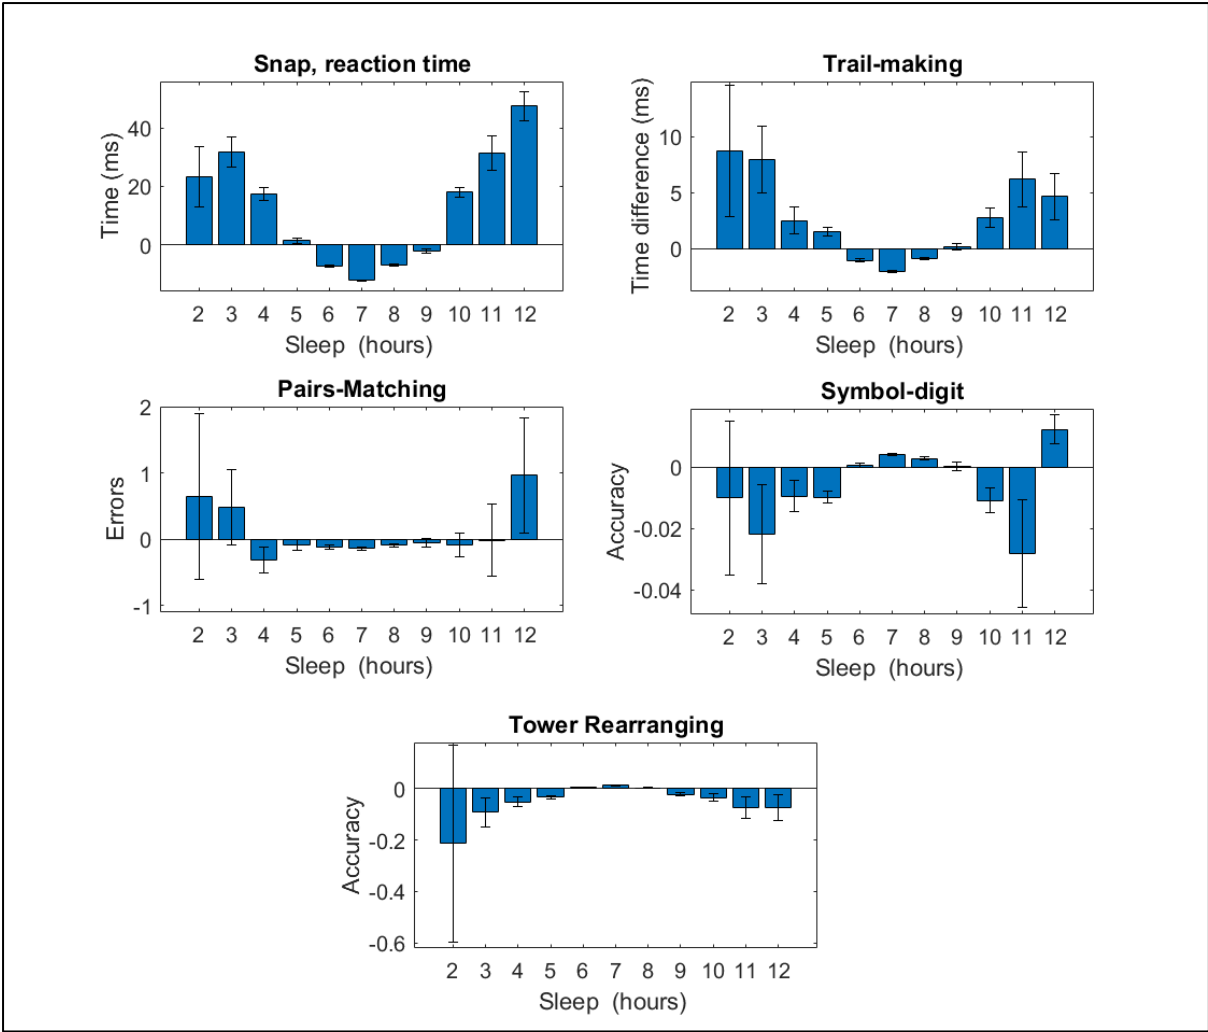

**Supplementary Figure 1. Relationship between sleep duration and individual cognitive tasks**

The performance on individual cognitive tasks (age-residuals) across different sleep durations showed a quadratic, inverted 'u'-shape relationship with better performance associated with seven hours of sleep, as seen with the latent variable of executive function, in all cognitive tasks apart from pairs-matching.

**Supplementary Table 3. Association between volume of sleep-related brain regions with sleep duration (6-8 hours), sleep characteristics, obstructive sleep apnoea traits and baseline characteristics of vascular status, genetic risk and socioeconomic status.**

|                                 | <b>Unstandardized<br/>beta estimate</b> | <b>Standard<br/>Error</b> | <b>t</b>    | <b>p</b>          |
|---------------------------------|-----------------------------------------|---------------------------|-------------|-------------------|
| <b>Sleep band 6-8 hours</b>     | <b>0.063</b>                            | <b>0.028</b>              | <b>2.24</b> | <b>*0.025</b>     |
| Sleep chronotype                |                                         |                           |             |                   |
| Intermediate (baseline)         | --                                      | --                        | --          | --                |
| Morning                         | 0.021                                   | 0.021                     | 1.00        | 0.316             |
| Evening                         | -0.028                                  | 0.030                     | -0.94       | 0.346             |
| Report of insomnia              | 0.010                                   | 0.012                     | 0.84        | 0.400             |
| Obstructive sleep apnoea traits |                                         |                           |             |                   |
| Daytime sleepiness              | -0.026                                  | 0.017                     | -1.51       | 0.130             |
| Report of snoring               | -0.049                                  | 0.018                     | -2.66       | <b>*0.008</b>     |
| Smoking pack years              | -0.003                                  | 0.001                     | -5.05       | <b>*&lt;0.001</b> |
| Vascular comorbidity            | -0.054                                  | 0.013                     | -4.31       | <b>*&lt;0.001</b> |
| APOE $\epsilon$ status          | -0.001                                  | 0.017                     | -0.05       | 0.957             |
| Body mass index (BMI)           | -0.021                                  | 0.003                     | -7.91       | <b>*&lt;0.001</b> |
| Socio-economic status           | -0.005                                  | 0.003                     | -1.39       | 0.164             |

*Summary volume measure was created based on 46 brain regions which had a significant quadratic relationship with sleep duration.*

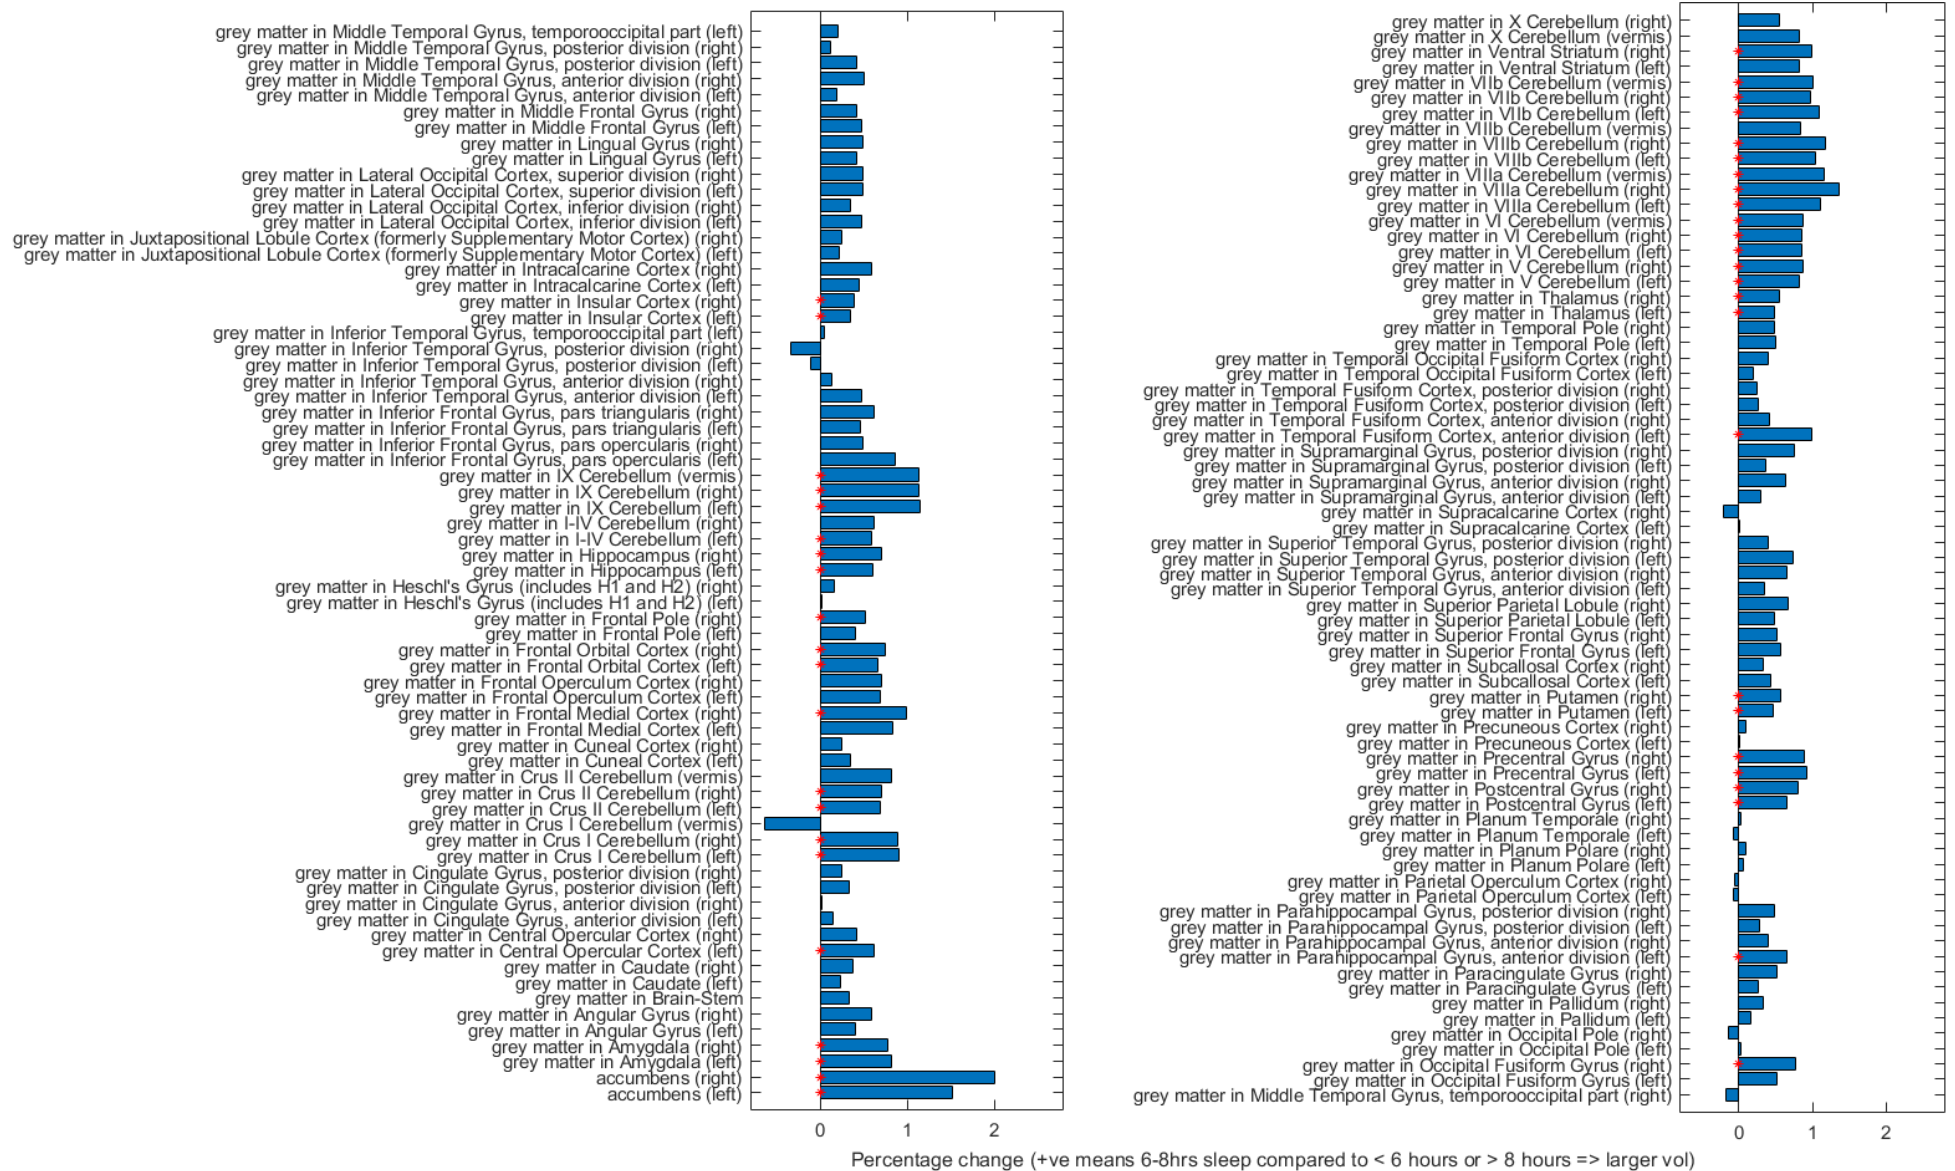

**Supplementary Figure 2. Differences in brain volume across 139 cortical and subcortical brain regions in participants who slept between six-to-eight hours and all other sleep duration. Red stars (\*) indicates brain volumes with significant difference, following multiple comparison.**

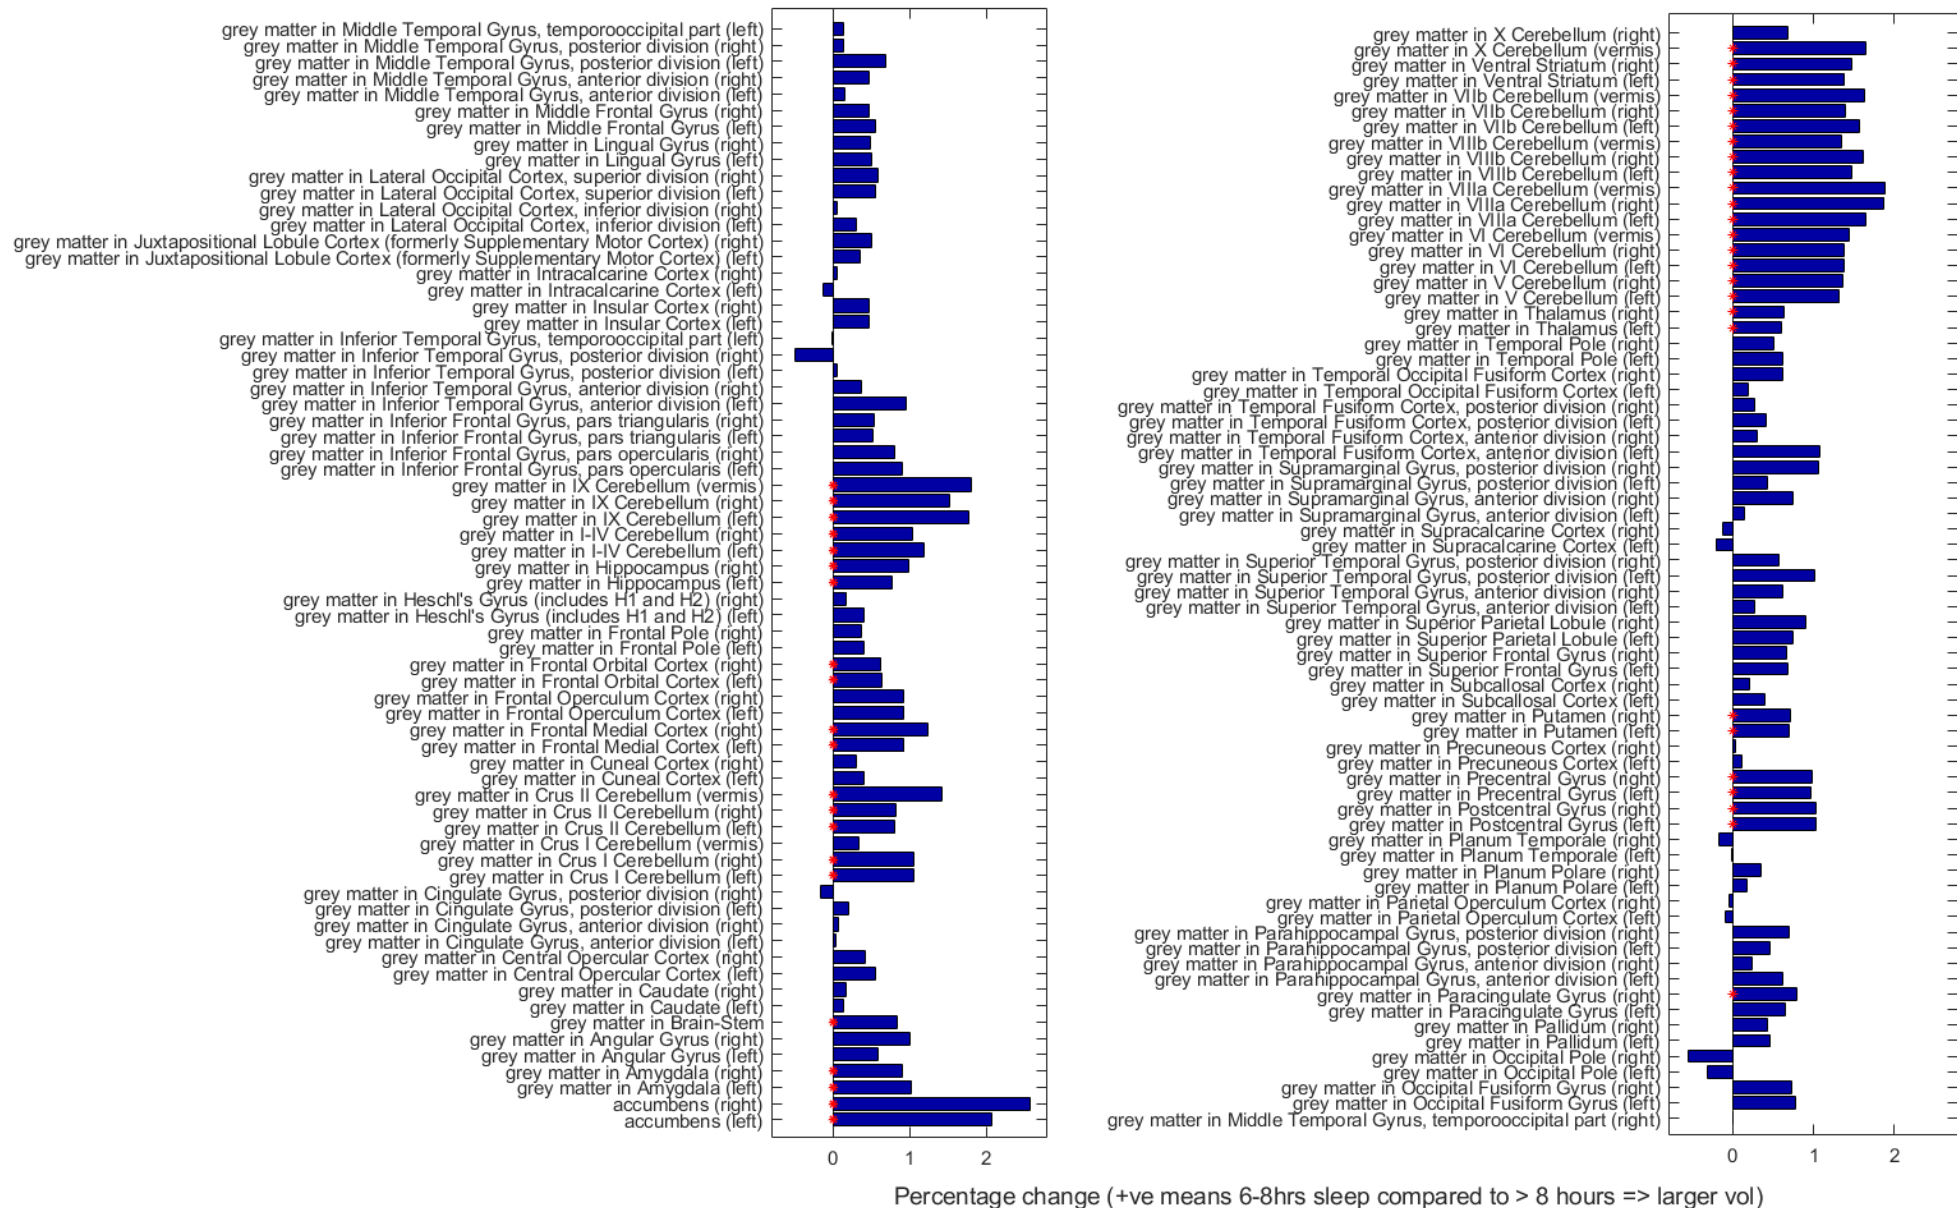

**Supplementary Figure 3. Differences in brain volume across 139 cortical and subcortical brain regions in participants who slept between six-to-eight hours and more than eight hours duration. Red stars (\*) indicates brain volumes with significant difference, following multiple comparison.**



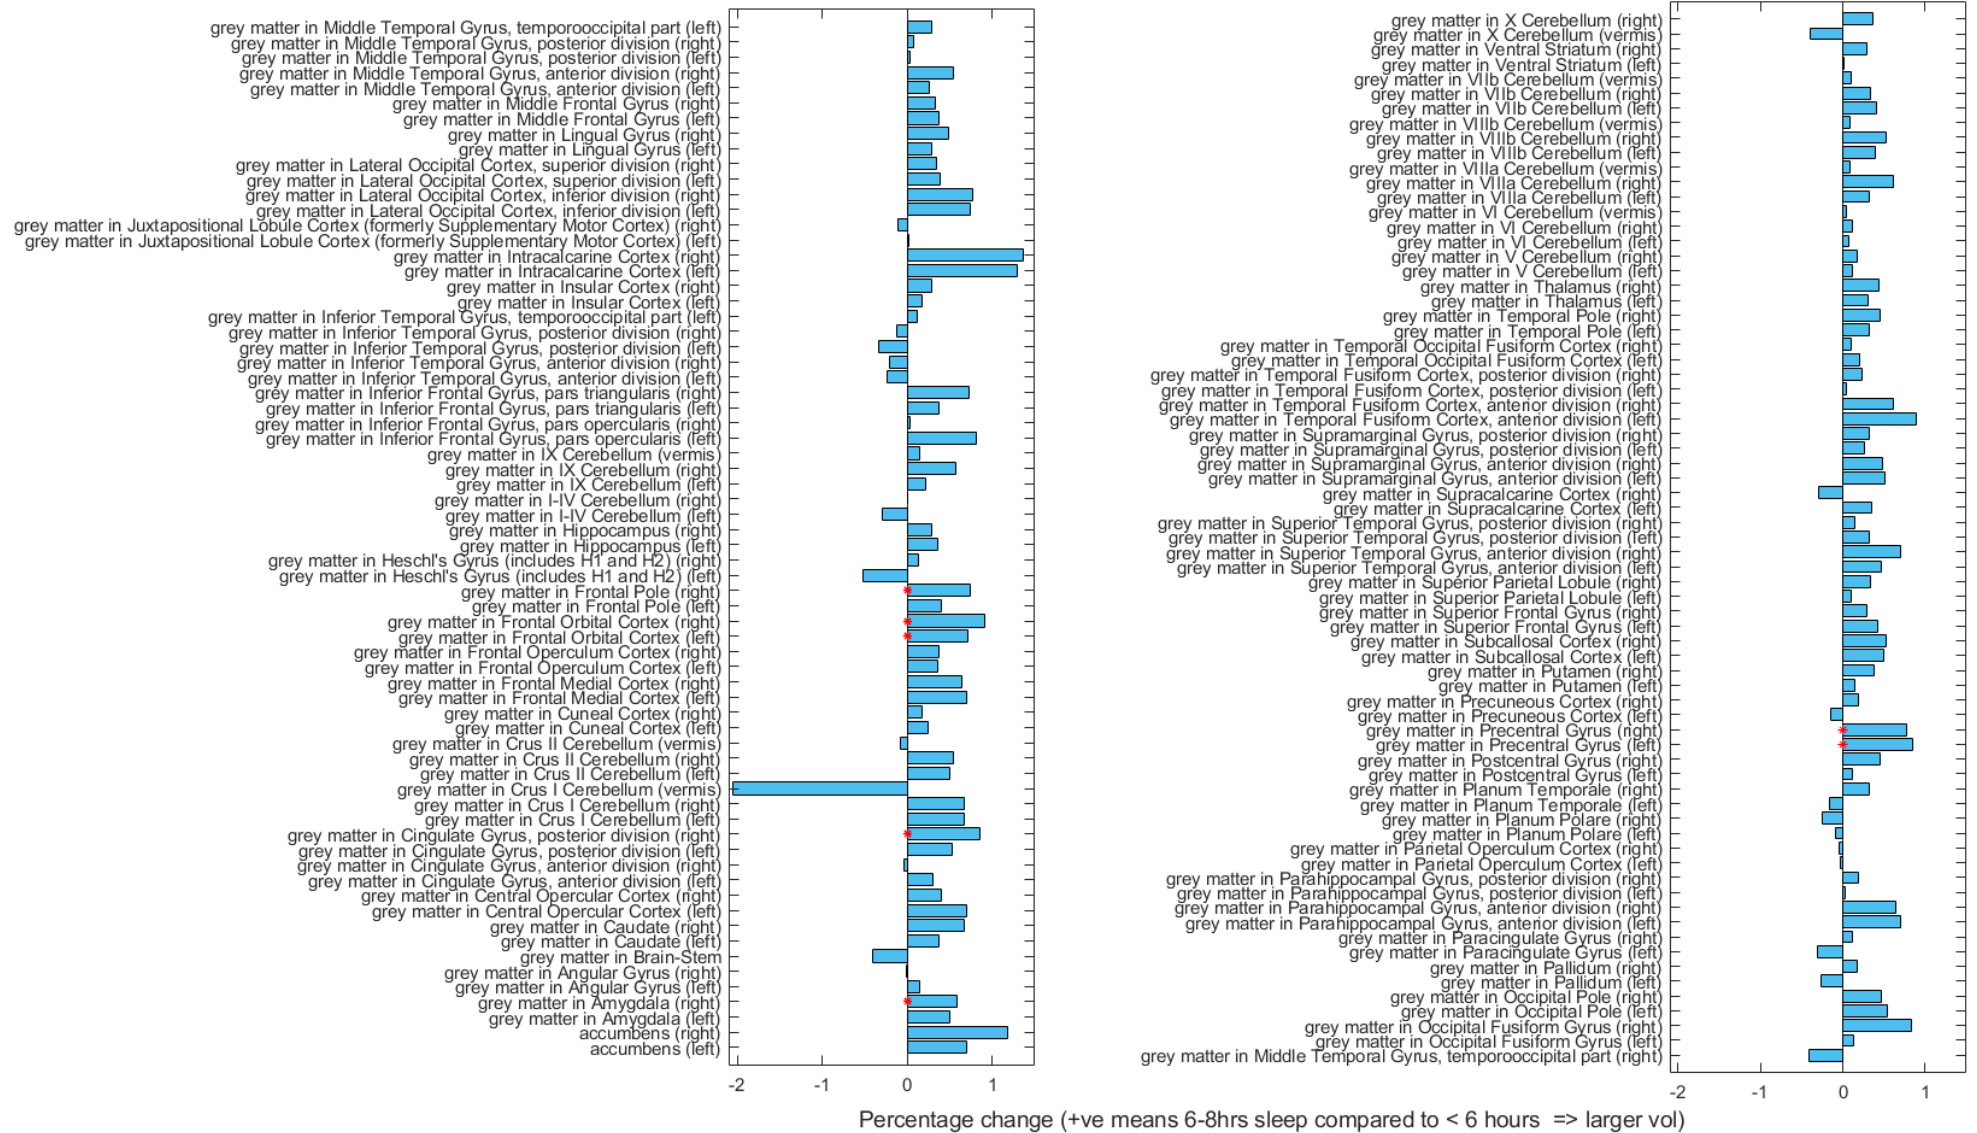

**Supplementary Figure 4. Differences in brain volume across 139 cortical and subcortical brain regions in participants who slept between six-to-eight hours and less than eight hours duration. Red stars (\*) indicates brain volumes with significant difference, following multiple comparison.**

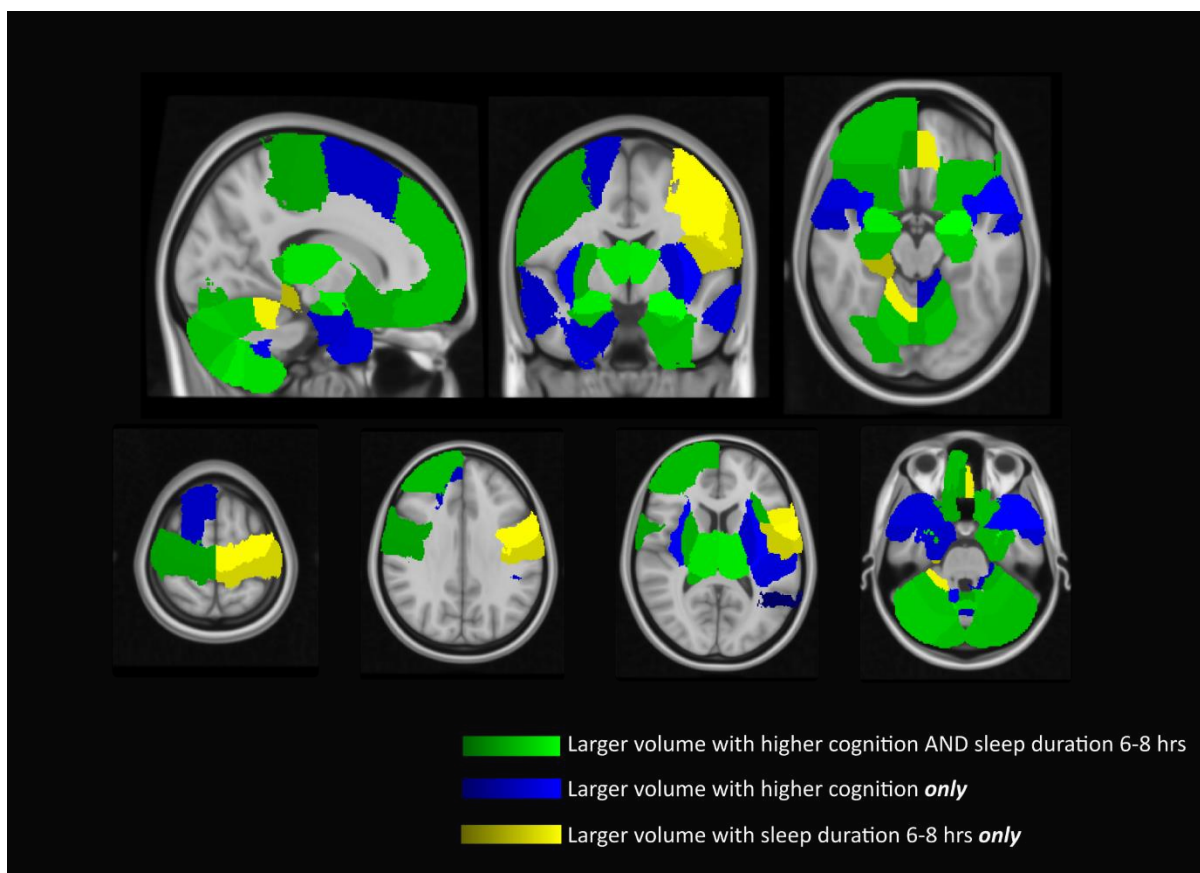

**Supplementary Figure 5. Regional brain volumes which are significantly associated with a higher executive function score and sleep duration six-to-eight hours.** Volume in 56 brain regions significantly predicted executive function while volume in 46 brain regions was higher with a six-to-eight sleep duration. Forty-one of these brain regions overlapped.

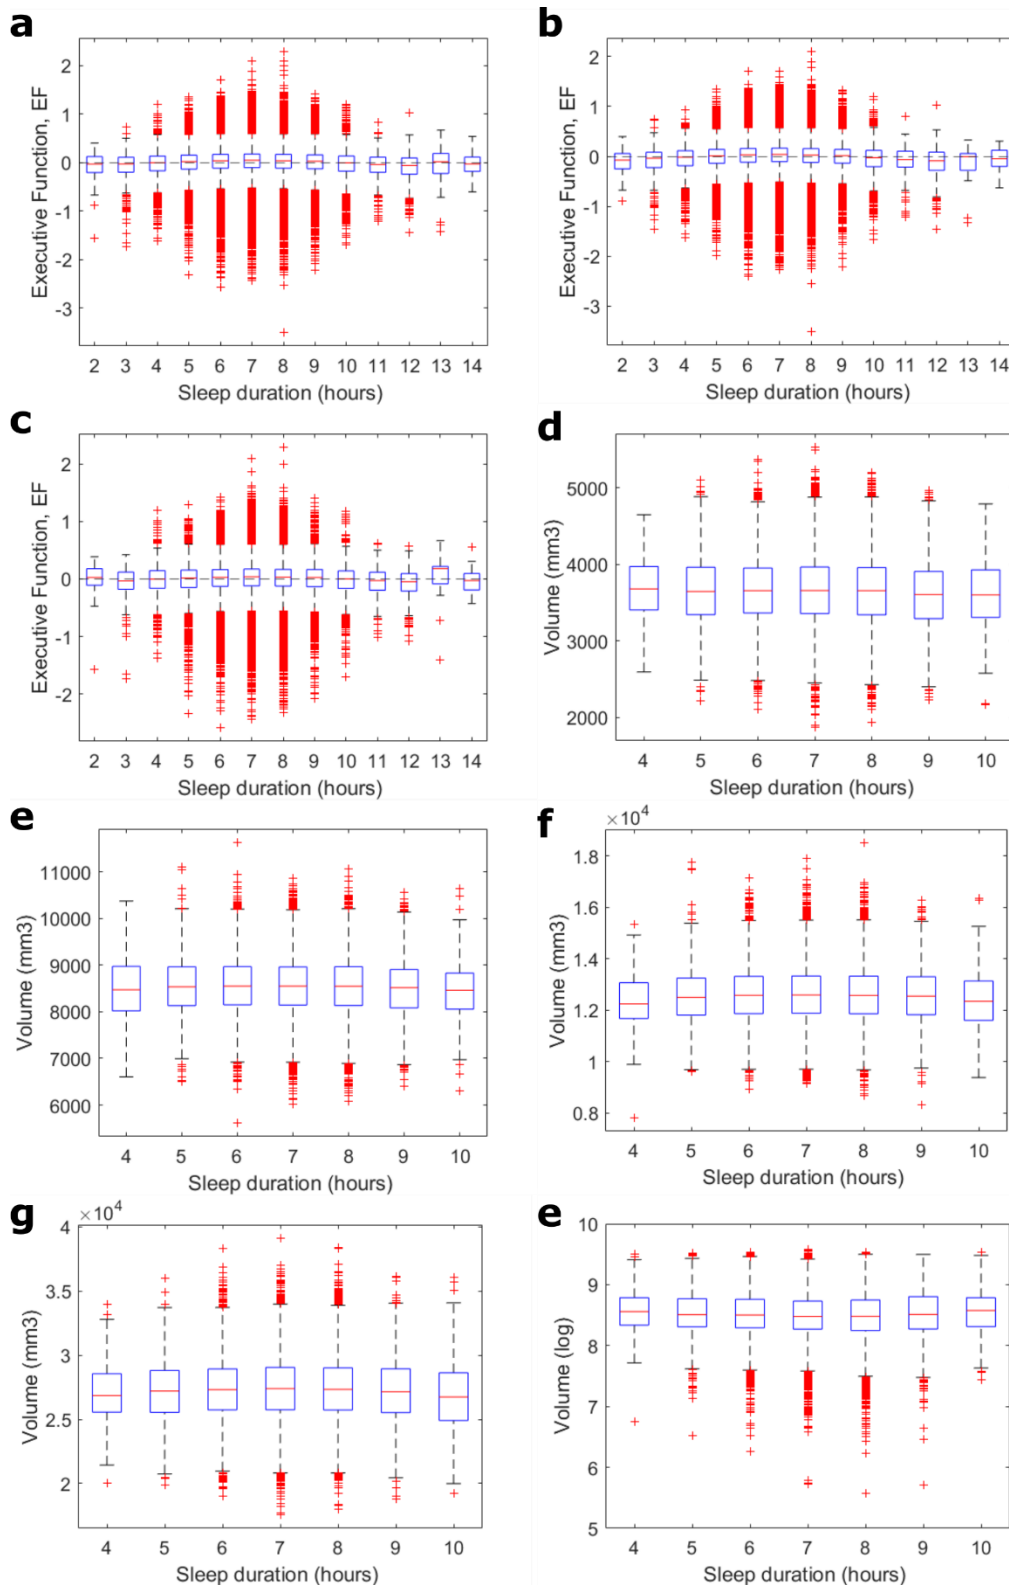

**Supplementary Figure 6. Boxplot representations of data from main paper figures.** The relationship between sleep duration and age-residual executive function scores in **a**, all participants, **b**, participants younger than 60 years and **c**, participants older than 60 years. Relationship between sleep duration and brain volume in **d**, orbital frontal cortex, **e**, precentral gyrus, **f**, Hippocampi, **g**, Cerebellar vermis regions and **e**, white matter hyperintensities. Centre of each box is the median, bottom and top edges indicate 25<sup>th</sup> and 75<sup>th</sup> percentile. Crosses are outliers.
