# Supplementary material for: Impact of sleep duration on executive function and brain structure
Source: PubMed Central journal article supplement (PMC8894343; doi:10.1038/s42003-022-03123-3), 2022-03-03
Supplement: 42003_2022_3123_MOESM3_ESM.pdf [file 42003_2022_3123_MOESM3_ESM.pdf]

## Description of Additional Supplementary Files

**File name:** Supplementary Data 1

**Description:** Summary of source data used in article figures.

**File name:** Supplementary Data 2

**Description:** Relationship between brain volume in each of the 139 cortical and subcortical brain regions and Executive Function.
