# Supplementary material for: Impact of sleep duration on executive function and brain structure
Source: PubMed Central journal article supplement (PMC8894343; doi:10.1038/s42003-022-03123-3), 2022-03-03
Supplement: 42003_2022_3123_MOESM6_ESM.pdf [file 42003_2022_3123_MOESM6_ESM.pdf]

## Reporting Summary

Nature Portfolio wishes to improve the reproducibility of the work that we publish. This form provides structure for consistency and transparency in reporting. For further information on Nature Portfolio policies, see our [Editorial Policies](#) and the [Editorial Policy Checklist](#).

### Statistics

For all statistical analyses, confirm that the following items are present in the figure legend, table legend, main text, or Methods section.

- |     |           |
|-----|-----------|
| n/a | Confirmed |
|-----|-----------|
- The exact sample size ( $n$ ) for each experimental group/condition, given as a discrete number and unit of measurement
  - A statement on whether measurements were taken from distinct samples or whether the same sample was measured repeatedly
  - The statistical test(s) used AND whether they are one- or two-sided  
*Only common tests should be described solely by name; describe more complex techniques in the Methods section.*
  - A description of all covariates tested
  - A description of any assumptions or corrections, such as tests of normality and adjustment for multiple comparisons
  - A full description of the statistical parameters including central tendency (e.g. means) or other basic estimates (e.g. regression coefficient) AND variation (e.g. standard deviation) or associated estimates of uncertainty (e.g. confidence intervals)
  - For null hypothesis testing, the test statistic (e.g.  $F$ ,  $t$ ,  $r$ ) with confidence intervals, effect sizes, degrees of freedom and  $P$  value noted  
*Give  $P$  values as exact values whenever suitable.*
  - For Bayesian analysis, information on the choice of priors and Markov chain Monte Carlo settings
  - For hierarchical and complex designs, identification of the appropriate level for tests and full reporting of outcomes
  - Estimates of effect sizes (e.g. Cohen's  $d$ , Pearson's  $r$ ), indicating how they were calculated

*Our web collection on [statistics for biologists](#) contains articles on many of the points above.*

### Software and code

Policy information about [availability of computer code](#)

|                 |                                                                                                                                                                                                           |
|-----------------|-----------------------------------------------------------------------------------------------------------------------------------------------------------------------------------------------------------|
| Data collection | N/A                                                                                                                                                                                                       |
| Data analysis   | RStudio Version 1.3.1093<br>Structural Equation Modelling: R Lavaan package<br>Matlab R2019b<br>Conditional plotting (sliding window analysis): <a href="https://osf.io/vmabg/">https://osf.io/vmabg/</a> |

For manuscripts utilizing custom algorithms or software that are central to the research but not yet described in published literature, software must be made available to editors and reviewers. We strongly encourage code deposition in a community repository (e.g. GitHub). See the Nature Portfolio [guidelines for submitting code & software](#) for further information.

### Data

Policy information about [availability of data](#)

All manuscripts must include a [data availability statement](#). This statement should provide the following information, where applicable:

- Accession codes, unique identifiers, or web links for publicly available datasets
- A description of any restrictions on data availability
- For clinical datasets or third party data, please ensure that the statement adheres to our [policy](#)

The data analysed in the current study are available from the UK Biobank <https://www.ukbiobank.ac.uk/researchers>. The variables used are detailed in Table S2. Code for the sliding window analysis is available from <https://osf.io/vmabg/>

## Field-specific reporting

Please select the one below that is the best fit for your research. If you are not sure, read the appropriate sections before making your selection.

Life sciences  Behavioural & social sciences  Ecological, evolutionary & environmental sciences

For a reference copy of the document with all sections, see [nature.com/documents/nr-reporting-summary-flat.pdf](https://www.nature.com/documents/nr-reporting-summary-flat.pdf)

## Life sciences study design

All studies must disclose on these points even when the disclosure is negative.

|                 |                                                                                                                                                                                                                                                                                                                                                                                                                                                                                                                                                                                                                                                                                                                                                                                                                |
|-----------------|----------------------------------------------------------------------------------------------------------------------------------------------------------------------------------------------------------------------------------------------------------------------------------------------------------------------------------------------------------------------------------------------------------------------------------------------------------------------------------------------------------------------------------------------------------------------------------------------------------------------------------------------------------------------------------------------------------------------------------------------------------------------------------------------------------------|
| Sample size     | Data from 479 420 individuals were included in the study. These were the maximum number of people with data available in the UK Biobank at the time of analysis after exclusions (see below).                                                                                                                                                                                                                                                                                                                                                                                                                                                                                                                                                                                                                  |
| Data exclusions | We excluded individuals with history or current diagnoses of neurological disease, brain injury, stroke, transient ischaemic attack, subdural or subarachnoid haematoma; infection of the nervous system; brain abscess, haemorrhage or skull fracture; encephalitis, meningitis, chronic neurological problem, amyotrophic lateral sclerosis, multiple sclerosis, Parkinson's or Alzheimer's disease, epilepsy, head injury, alcohol, opioid and other dependency according to the non-cancer illnesses codes ( <a href="http://biobank.ndph.ox.ac.uk/showcase/coding.cgi?id=6">http://biobank.ndph.ox.ac.uk/showcase/coding.cgi?id=6</a> ) and algorithmic-defined outcomes ( <a href="https://biobank.ndph.ox.ac.uk/showcase/label.cgi?id=42">https://biobank.ndph.ox.ac.uk/showcase/label.cgi?id=42</a> ). |
| Replication     | The main model was tested and replicated successfully. Multiple regression was performed on a secondary software to check the same result was obtained.                                                                                                                                                                                                                                                                                                                                                                                                                                                                                                                                                                                                                                                        |
| Randomization   | The majority of our analysis were conducted across the entire population. No randomization was necessary as we were looking at continuous variables across the population                                                                                                                                                                                                                                                                                                                                                                                                                                                                                                                                                                                                                                      |
| Blinding        | Blinding was not relevant to this observational study as analyses included the entire population.                                                                                                                                                                                                                                                                                                                                                                                                                                                                                                                                                                                                                                                                                                              |

## Reporting for specific materials, systems and methods

We require information from authors about some types of materials, experimental systems and methods used in many studies. Here, indicate whether each material, system or method listed is relevant to your study. If you are not sure if a list item applies to your research, read the appropriate section before selecting a response.

### Materials & experimental systems

| n/a                                 | Involvement in the study                                        |
|-------------------------------------|-----------------------------------------------------------------|
| <input checked="" type="checkbox"/> | <input type="checkbox"/> Antibodies                             |
| <input checked="" type="checkbox"/> | <input type="checkbox"/> Eukaryotic cell lines                  |
| <input checked="" type="checkbox"/> | <input type="checkbox"/> Palaeontology and archaeology          |
| <input checked="" type="checkbox"/> | <input type="checkbox"/> Animals and other organisms            |
| <input type="checkbox"/>            | <input checked="" type="checkbox"/> Human research participants |
| <input checked="" type="checkbox"/> | <input type="checkbox"/> Clinical data                          |
| <input checked="" type="checkbox"/> | <input type="checkbox"/> Dual use research of concern           |

### Methods

| n/a                                 | Involvement in the study                                   |
|-------------------------------------|------------------------------------------------------------|
| <input checked="" type="checkbox"/> | <input type="checkbox"/> ChIP-seq                          |
| <input checked="" type="checkbox"/> | <input type="checkbox"/> Flow cytometry                    |
| <input type="checkbox"/>            | <input checked="" type="checkbox"/> MRI-based neuroimaging |

## Human research participants

Policy information about [studies involving human research participants](#)

|                            |                                                                                                                                                                                                                                                                                                                                             |
|----------------------------|---------------------------------------------------------------------------------------------------------------------------------------------------------------------------------------------------------------------------------------------------------------------------------------------------------------------------------------------|
| Population characteristics | Demographic, clinical and genetic data was analysed in 479, 420 individuals from the UK Biobank aged between 38-73 (mean age 57, SD 8) years at the time of their baseline assessment. 54.8% were female.                                                                                                                                   |
| Recruitment                | Participants were recruited by UK Biobank. 9.2 million individuals were invited to take part living within 40km of the assessment centres across the UK. Detailed investigations of the representativeness of the sample has revealed a bias towards healthier, more educated and higher socio-economic status than the general population. |
| Ethics oversight           | Research Ethics Committee (REC number 11/NW/0382)                                                                                                                                                                                                                                                                                           |

Note that full information on the approval of the study protocol must also be provided in the manuscript.

## Magnetic resonance imaging

### Experimental design

|                                 |                                                                                                                                                                                                                                                                                                                         |
|---------------------------------|-------------------------------------------------------------------------------------------------------------------------------------------------------------------------------------------------------------------------------------------------------------------------------------------------------------------------|
| Design type                     | Multimodal imaging                                                                                                                                                                                                                                                                                                      |
| Design specifications           | Imaging derived phenotypes (IDPs) were used in the analyses. All preprocessing and analyses were conducted according to the UK Biobank imaging pipeline. Details of their generation is available here: <a href="https://doi.org/10.1016/j.neuroimage.2017.10.034">https://doi.org/10.1016/j.neuroimage.2017.10.034</a> |
| Behavioral performance measures | N/A                                                                                                                                                                                                                                                                                                                     |

### Acquisition

|                               |                                                                                                                                                                                                            |
|-------------------------------|------------------------------------------------------------------------------------------------------------------------------------------------------------------------------------------------------------|
| Imaging type(s)               | Structural                                                                                                                                                                                                 |
| Field strength                | 3T                                                                                                                                                                                                         |
| Sequence & imaging parameters | Sequence and imaging parameters are openly available here: <a href="https://biobank.ctsu.ox.ac.uk/crystal/crystal/docs/brain_mri.pdf">https://biobank.ctsu.ox.ac.uk/crystal/crystal/docs/brain_mri.pdf</a> |
| Area of acquisition           | Whole Brain                                                                                                                                                                                                |
| Diffusion MRI                 | <input type="checkbox"/> Used <input checked="" type="checkbox"/> Not used                                                                                                                                 |

### Preprocessing

|                            |                                                                                                                                                                        |
|----------------------------|------------------------------------------------------------------------------------------------------------------------------------------------------------------------|
| Preprocessing software     | The full processing pipeline is openly available here: <a href="https://doi.org/10.1016/j.neuroimage.2017.10.034">https://doi.org/10.1016/j.neuroimage.2017.10.034</a> |
| Normalization              | See above                                                                                                                                                              |
| Normalization template     | MNI 152                                                                                                                                                                |
| Noise and artifact removal | See above                                                                                                                                                              |
| Volume censoring           | See above                                                                                                                                                              |

### Statistical modeling & inference

|                                                                           |                                                                                                                  |
|---------------------------------------------------------------------------|------------------------------------------------------------------------------------------------------------------|
| Model type and settings                                                   | N/A                                                                                                              |
| Effect(s) tested                                                          | N/A                                                                                                              |
| Specify type of analysis:                                                 | <input type="checkbox"/> Whole brain <input checked="" type="checkbox"/> ROI-based <input type="checkbox"/> Both |
| Anatomical location(s)                                                    | Structural: FSL FAST and FIRST segmentation following the Oxford-Harvard cortical and subcortical atlas          |
| Statistic type for inference<br>(See <a href="#">Eklund et al. 2016</a> ) | n/a                                                                                                              |
| Correction                                                                | see above                                                                                                        |

### Models & analysis

|                                     |                                                                       |
|-------------------------------------|-----------------------------------------------------------------------|
| n/a                                 | Involves in the study                                                 |
| <input checked="" type="checkbox"/> | <input type="checkbox"/> Functional and/or effective connectivity     |
| <input checked="" type="checkbox"/> | <input type="checkbox"/> Graph analysis                               |
| <input checked="" type="checkbox"/> | <input type="checkbox"/> Multivariate modeling or predictive analysis |
